# Supplementary material for: Solid State Phosphorescence Enhancement of PtII-Based Emitters via Combination of π-Hole(Isocyano Group)⋅⋅⋅ dz2[PtII] and I···Cl Halogen-Bonding Interactions
Source: MDPI journal article supplement (doi:10.3390/inorganics11100403), 2023-10-13
Supplement: s1 [file s1]

## Supporting information

# Solid state phosphorescence enhancement of Pt<sup>II</sup>-based emitters via combination of $\pi$ -Hole(Isocyano Group)··· d<sub>z</sub><sup>2</sup>[Pt<sup>II</sup>] and I···Cl Halogen-Bonding Interactions

Svetlana A. Katkova,\* Elina V. Antonova, Anna M. Cheranyova, Daniil M. Ivanov, and Mikhail A. Kinzhalov

St Petersburg State University, 7/9 Universitetskaya Emb., Saint Petersburg, 199034, Russia

\* Correspondence: s.katkova@spbu.ru

## S1. X-ray diffraction studies

**Table S1.1** Crystal data and structure refinement for 1·½(1,4-DITFB) adduct.

| Identification code                         | 1·½(1,4-DITFB)                                                      |
|---------------------------------------------|---------------------------------------------------------------------|
| CCDC code                                   | 2290328                                                             |
| Empirical formula                           | C <sub>29</sub> H <sub>17</sub> ClF <sub>2</sub> IN <sub>2</sub> Pt |
| Formula weight                              | 788.89                                                              |
| Temperature/K                               | 100.02(10)                                                          |
| Crystal system                              | monoclinic                                                          |
| Space group                                 | P2 <sub>1</sub> /c                                                  |
| a/Å                                         | 15.9655(3)                                                          |
| b/Å                                         | 4.59870(10)                                                         |
| c/Å                                         | 34.1243(7)                                                          |
| α/°                                         | 90                                                                  |
| β/°                                         | 91.549(2)                                                           |
| γ/°                                         | 90                                                                  |
| Volume/Å <sup>3</sup>                       | 2504.51(9)                                                          |
| Z                                           | 4                                                                   |
| ρ <sub>calc</sub> /cm <sup>3</sup>          | 2.092                                                               |
| μ/mm <sup>-1</sup>                          | 21.449                                                              |
| F(000)                                      | 1484.0                                                              |
| Crystal size/mm <sup>3</sup>                | 0.1 × 0.1 × 0.1                                                     |
| Radiation                                   | CuKα (λ = 1.54184)                                                  |
| 2Θ range for data collection/°              | 5.182 to 130                                                        |
| Index ranges                                | -17 ≤ h ≤ 18, -5 ≤ k ≤ 5, -37 ≤ l ≤ 40                              |
| Reflections collected                       | 14691                                                               |
| Independent reflections                     | 4281 [R <sub>int</sub> = 0.0516, R <sub>sigma</sub> = 0.0464]       |
| Data/restraints/parameters                  | 4281/0/319                                                          |
| Goodness-of-fit on F <sup>2</sup>           | 1.221                                                               |
| Final R indexes [I>=2σ (I)]                 | R <sub>1</sub> = 0.0597, wR <sub>2</sub> = 0.1445                   |
| Final R indexes [all data]                  | R <sub>1</sub> = 0.0640, wR <sub>2</sub> = 0.1464                   |
| Largest diff. peak/hole / e Å <sup>-3</sup> | 2.31/-1.46                                                          |

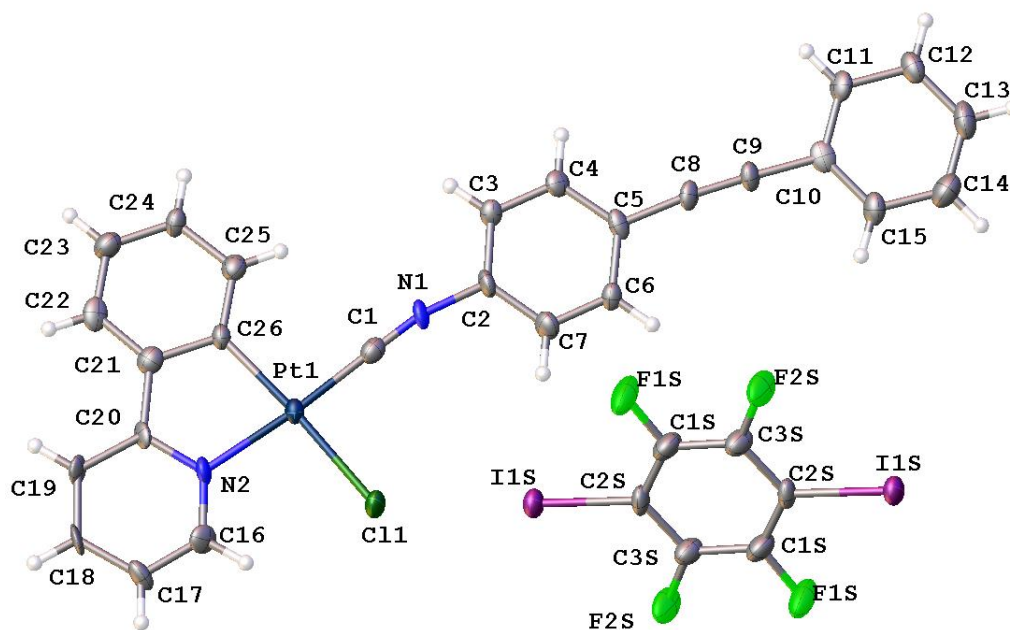

**Figure S1.1.** Molecular view of  $1 \cdot \frac{1}{2}(1,4\text{-DITFB})$ . Thermal ellipsoids for are drawn at the 50% probability level.

**Table S1.2.** Selected bond lengths (Å) and angles (°) for  $1 \cdot \frac{1}{2}(1,4\text{-DITFB})$ .

|         | Length, Å |                             | Angle, °  |
|---------|-----------|-----------------------------|-----------|
| Pt1–N2  | 2.077(3)  | $\angle(\text{C26–Pt1–N2})$ | 81.2(5)   |
| Pt1–C26 | 2.010(12) | $\angle(\text{N2–Pt1–Cl1})$ | 94.9(3)   |
| Pt1–Cl1 | 2.396(3)  | $\angle(\text{C1–Pt1–C26})$ | 94.2(5)   |
| Pt1–C1  | 1.908(14) | $\angle(\text{N1–C1–Pt1})$  | 178.4(12) |
| N1–C1   | 1.147(17) | $\angle(\text{C1–N1–C2})$   | 168.4(13) |
| C8–C9   | 1.211(19) | $\angle(\text{C5–C8–C9})$   | 174.6(14) |

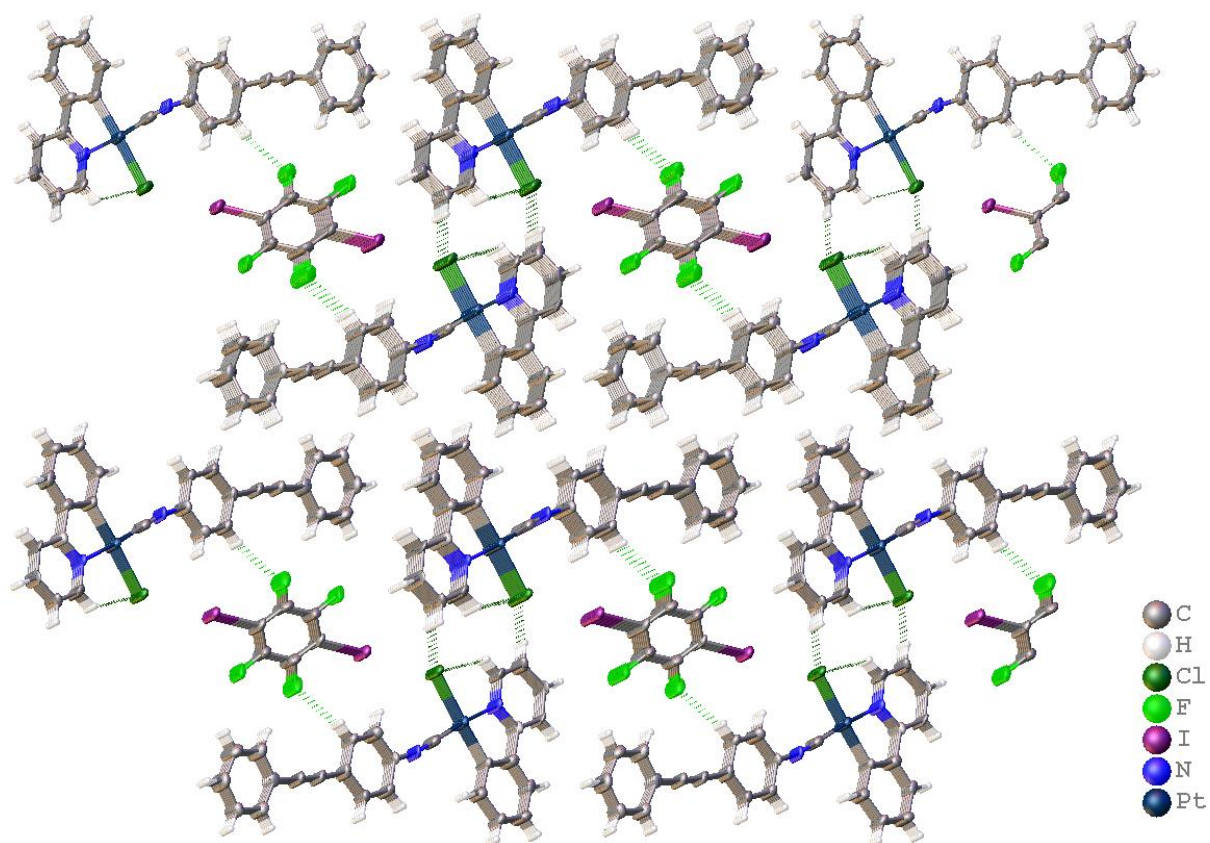

**Figure S1.2.** A fragment of the crystal packing of  $1 \cdot \frac{1}{2}(1,4\text{-DITFB})$ .

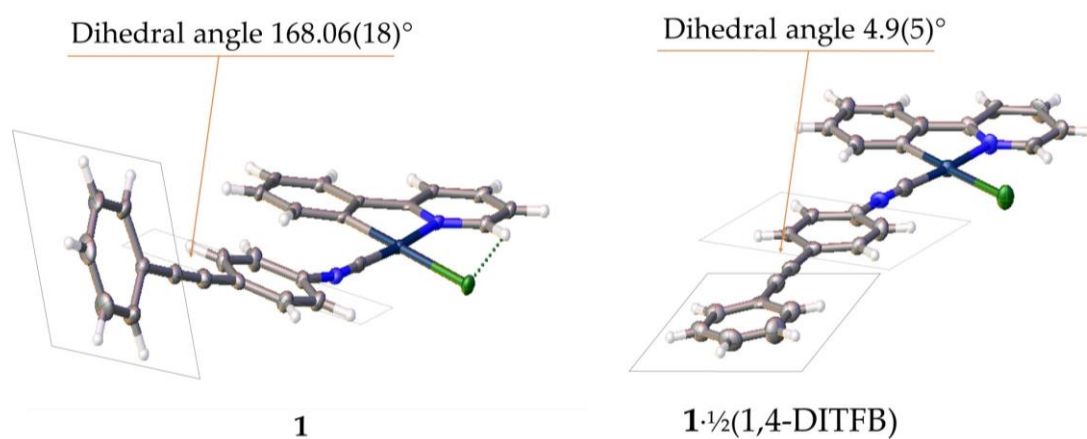

**Figure S1.3.** Molecule structures of complex **1** in the crystals of pure **1** [58] and adduct  $1 \cdot \frac{1}{2}(1,4\text{-DITFB})$ .

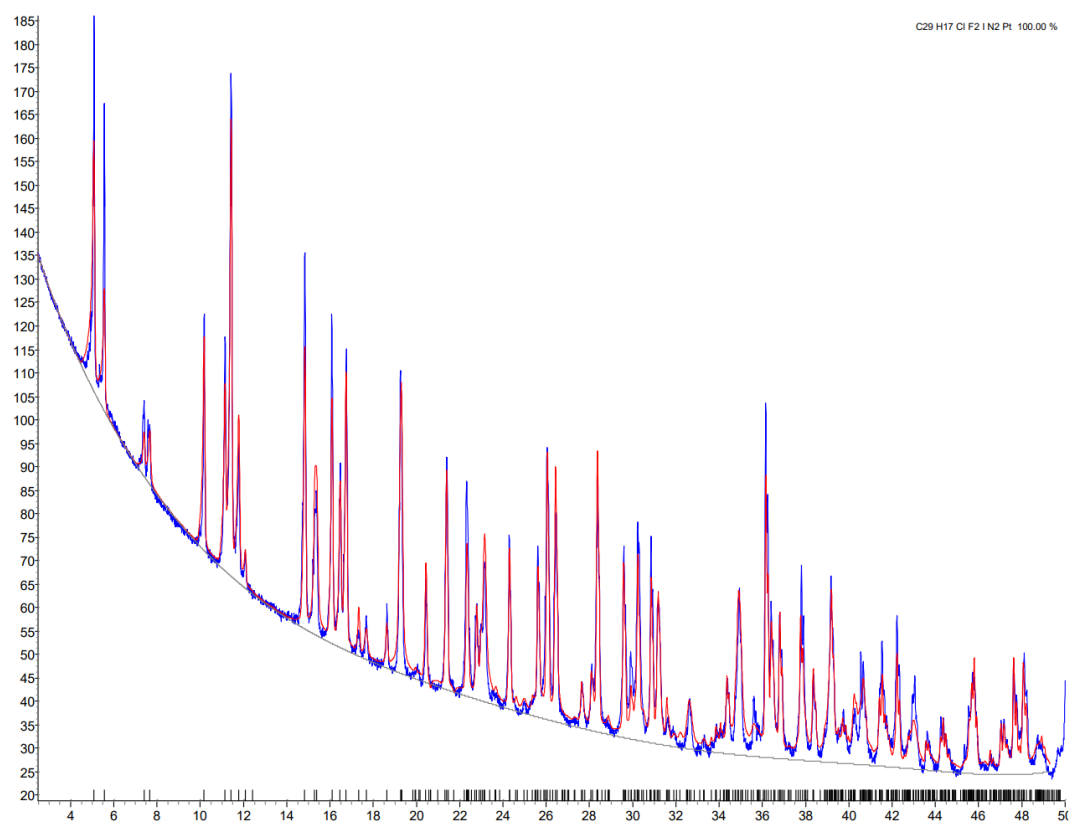

**Figure S1.4.** The measured powder X-ray diffraction patterns of crystalline  $1\cdot\frac{1}{2}(1,4\text{-DITFB})$ .

**Table S1.3** CSD data analysis.

| CCDC code | Structure                                                                           | Pt···N <sub>iso</sub> , Å | ∠(C≡N...Pt)          | Ref. |
|-----------|-------------------------------------------------------------------------------------|---------------------------|----------------------|------|
| 2044042   | 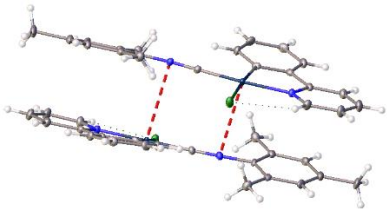   | 3.636(4),<br>3.832(4)     | 98.1(3),<br>93.4(3)  | [1]  |
| 2075446   |    | 3.624(5),<br>3.938(6)     | 106.4(4),<br>95.1(5) |      |
| 2078554   |   | 3.475(4)                  | 103.2(4)             |      |
| 2042219   |  | 3.501(3)                  | 86.1(3)              |      |
| 732182    |  | 3.62536(5)                | 94.4034(14)          | [2]  |
| 792590    |  | 3.654(12)                 | 104.5(10)            | [3]  |

|                    |                                                                                    |            |             |     |
|--------------------|------------------------------------------------------------------------------------|------------|-------------|-----|
| 893736             | 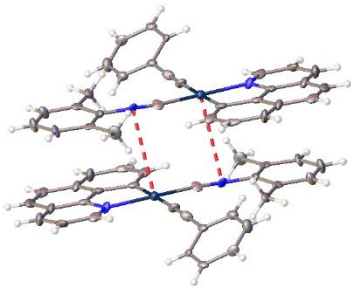  | 3.696(11)  | 86.0(9)     | [4] |
| 1987102            |   | 3.523(4)   | 86.3(3)     | [5] |
| 820799             |  | 3.62064(7) | 82.2962(19) | [6] |
| Comparison, Å      |                                                                                    |            |             |     |
| Bondi VdW radii    |                                                                                    | 3.30       |             |     |
| Batsanov VdW radii |                                                                                    | 3.65       |             |     |
| Alvarez VdW radii  |                                                                                    | 3.95       |             |     |

## S2. Theoretical calculations

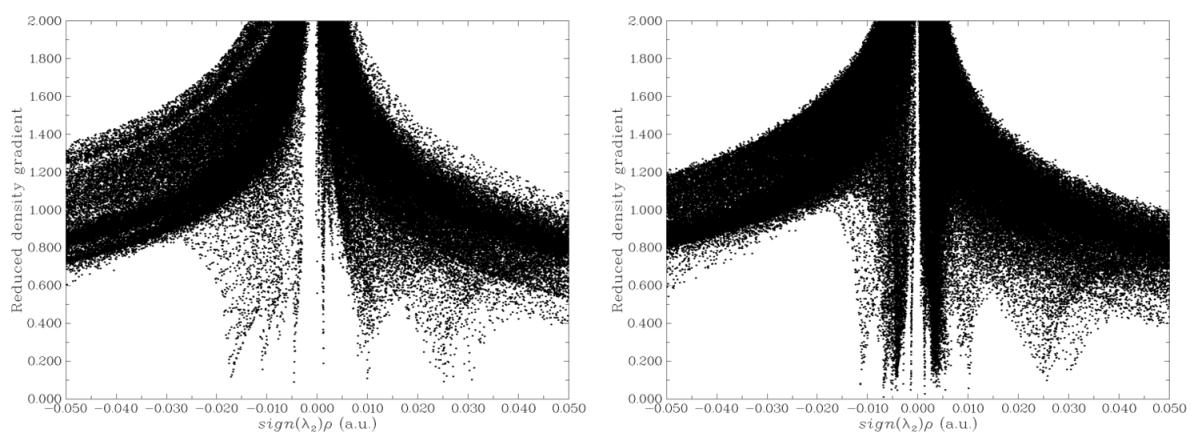

**Figure 2.1.** RDG( $\mathbf{r}$ ) –  $\text{sign}[\lambda_2(\mathbf{r})]\rho(\mathbf{r})$  plot for the I...Cl HaB in (left) and  $\text{N}_{\text{CN}}\cdots\text{Pt}$  contact (right) in the crystal structure of  $1\cdot\frac{1}{2}(1,4\text{-DITFB})$ .

### ELF and ED/ESP Minima Analysis

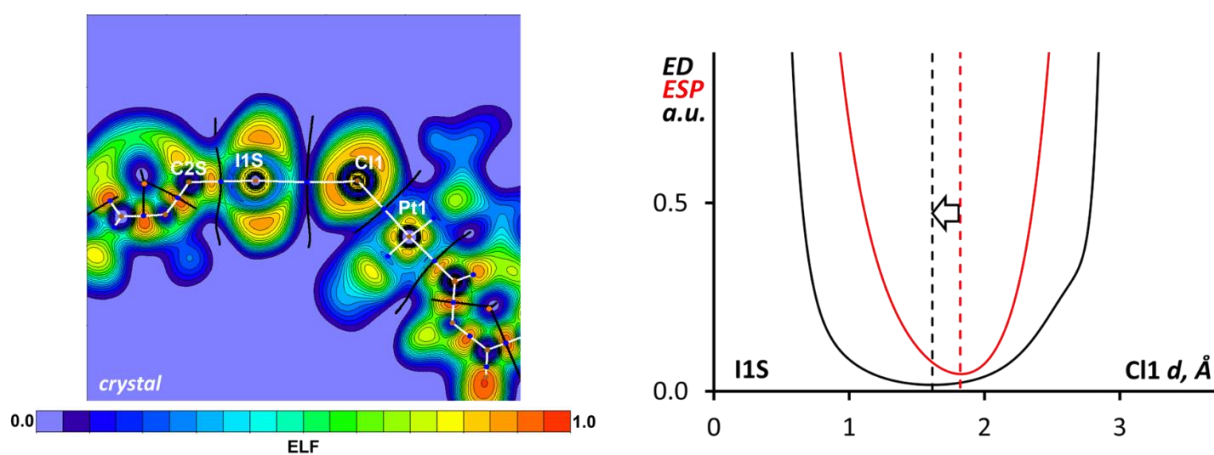

**Figure 2.2.** Left: ELF projections (contour lines with 0.05 step), bond paths (white lines), zero-flux surface projections (black lines), bond CPs (blue dots), nuclear CPs (brown dots), and ring CPs (orange dots). Right: The ED (black) vs. ESP (red) minima along the bond paths for the I...Cl HaB in the crystal structure of  $1\cdot\frac{1}{2}(1,4\text{-DITFB})$ .

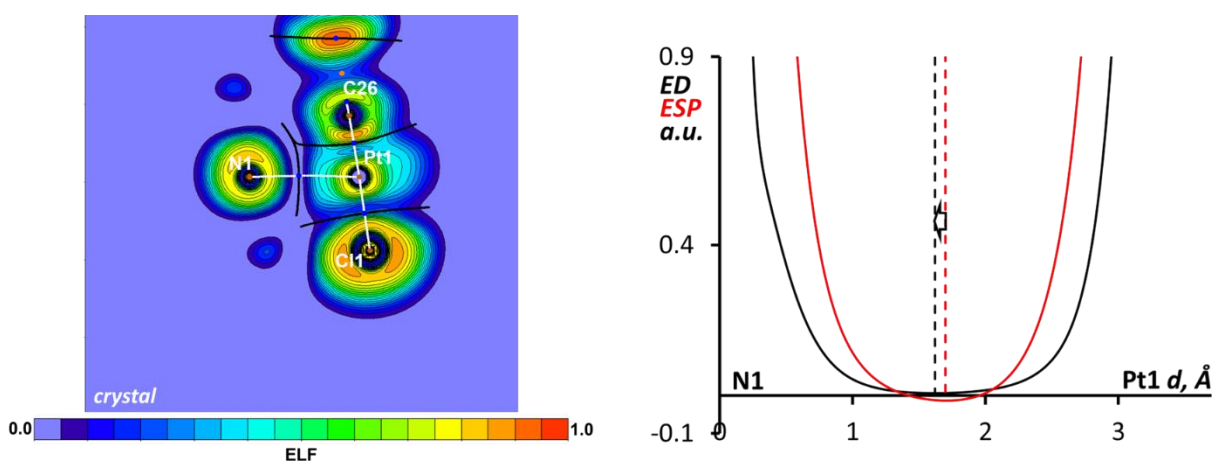

**Figure 2.3.** Left: ELF projections (contour lines with 0.05 step), bond paths (white lines), zero-flux surface projections (black lines), bond CPs (blue dots), nuclear CPs (brown dots), and ring CPs (orange dots). Right: The ED (black) vs. ESP (red) minima along the bond paths for the  $\text{N}_{\text{CN}}\cdots\text{Pt}$  contact in the crystal structure of  $1\cdot\frac{1}{2}(1,4\text{-DITFB})$ .

### Literature

1. Katkova, S.A., et al., *Intermolecular (Isocyano group)···PtII interactions involving coordinated isocyanides in cyclometalated PtII complexes*. J. Mol. Struct., 2022. **1253**: p. 132230.
2. Fornies, J., et al., *Luminescent benzoquinolate-isocyanide platinum(II) complexes: effect of PtPt and pipi interactions on their photophysical properties*. Chem Asian J, 2012. **7**(12): p. 2813-23.
3. Díez, A., et al., *Structural and luminescence studies on pi...pi and Pt...Pt interactions in mixed chloro-isocyanide cyclometalated platinum(II) complexes*. Inorg Chem, 2010. **49**(7): p. 3239-51.
4. Díez, Á., et al., *Synthesis and Luminescence of Cyclometalated Compounds with Nitrile and Isocyanide Ligands*. Organometallics, 2009. **28**(6): p. 1705-1718.
5. Martínez-Junquera, M., et al., *Isomerism, aggregation-induced emission and mechanochromism of isocyanide cycloplatinated(ii) complexes*. Journal of Materials Chemistry C, 2020. **8**(21): p. 7221-7233.
6. Kui, S.C., et al., *Luminescent organoplatinum(II) complexes with functionalized cyclometalated C<sup>N</sup>C ligands: structures, photophysical properties, and material applications*. Chemistry, 2012. **18**(1): p. 96-109.
